# Supplementary material for: Macroscopic waves, biological clocks and morphogenesis driven by light in a giant unicellular green alga
Source: Springer Nature journal article supplement (doi:10.1038/s41467-023-41813-6), 2023-10-04
Supplement: MOESM1 [file 41467_2023_41813_MOESM1_ESM.pdf]

## Supplementary Information

### Macroscopic waves, biological clocks and morphogenesis driven by light in a giant unicellular green alga

Eldad Afik,<sup>1,2\*</sup> Toni J.B. Liu,<sup>1</sup> Elliot M. Meyerowitz<sup>1,2\*</sup>

<sup>1</sup>Division of Biology and Biological Engineering, California Institute of Technology,  
1200 E California Blvd., Pasadena, CA 91125, USA

<sup>2</sup>Howard Hughes Medical Institute

\*Correspondence to [eldad.afik@gmail.com](mailto:eldad.afik@gmail.com), [meyerow@caltech.edu](mailto:meyerow@caltech.edu)

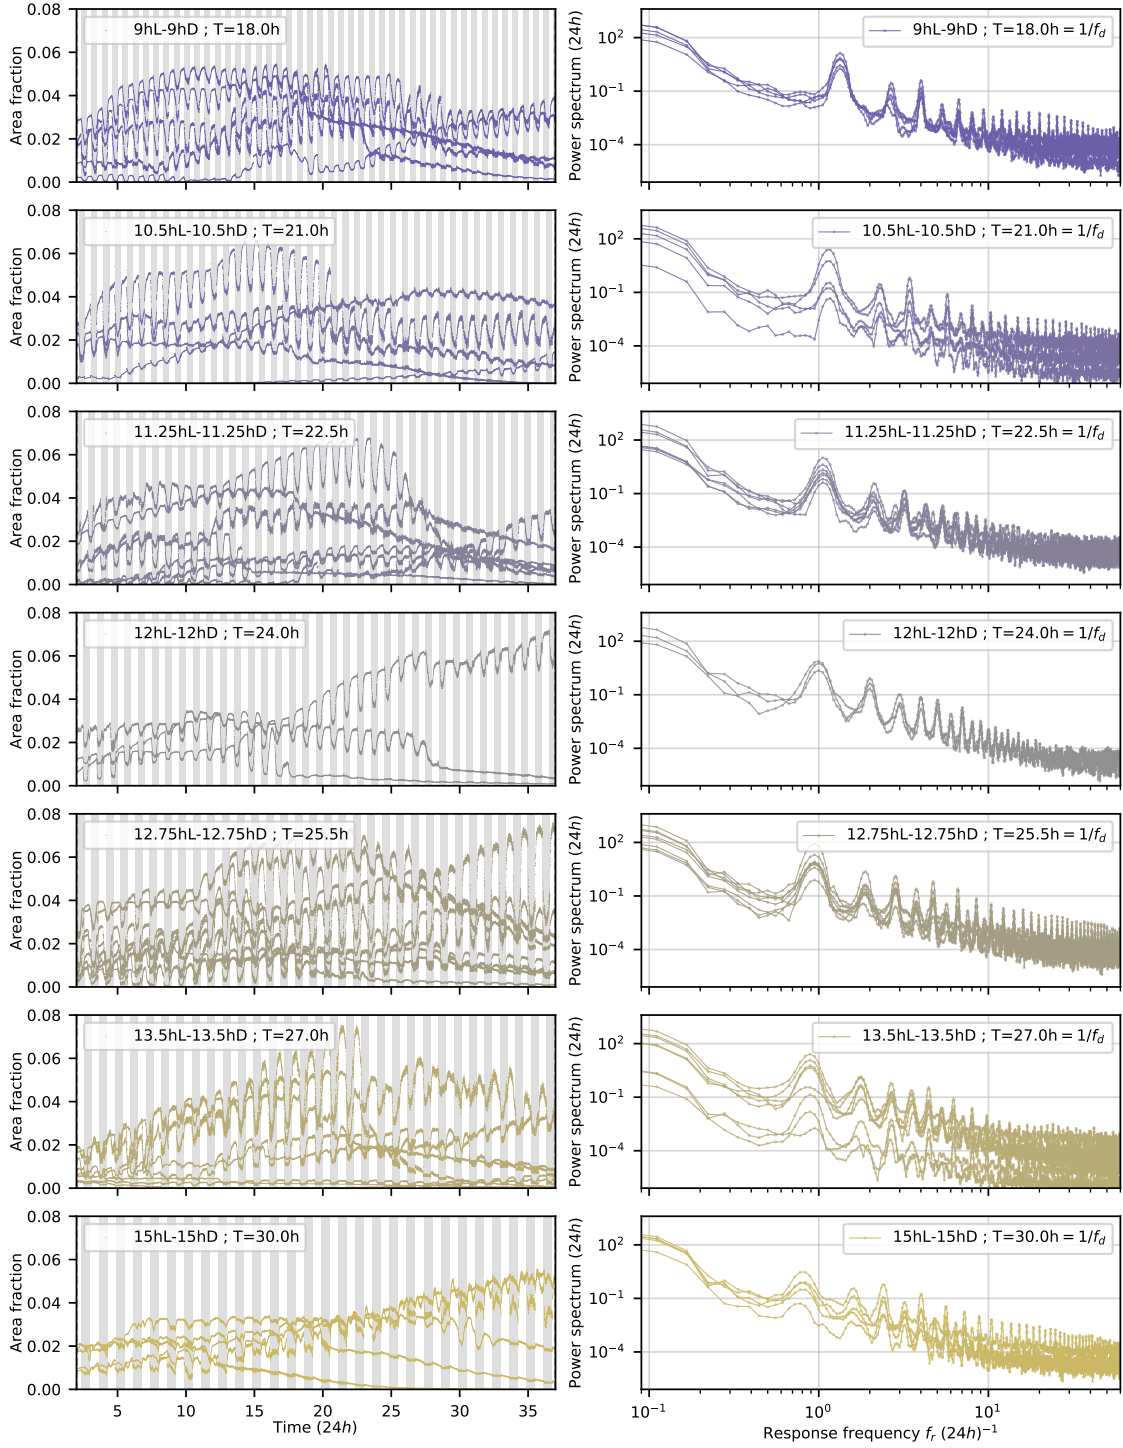

**Supplementary Fig. 1: Time series and corresponding power spectra under driving illumination periods within 18h to 30h.** Area fraction corresponds to the measured green area within a whole well, normalised by the area of the well. Each curve corresponds to a distinct sample. Response fundamental frequencies  $f_{r,0}$  inferred from the power spectra on the right are presented in Fig. 2d. Averages over power spectra curves, grouped by driving illumination frequencies,  $f_d = 1/T$ , are shown in Fig. 2c. The data in Fig. 2a,b are presented here again for comparison, labeled “12hL-12hD ; T=24.0h”.

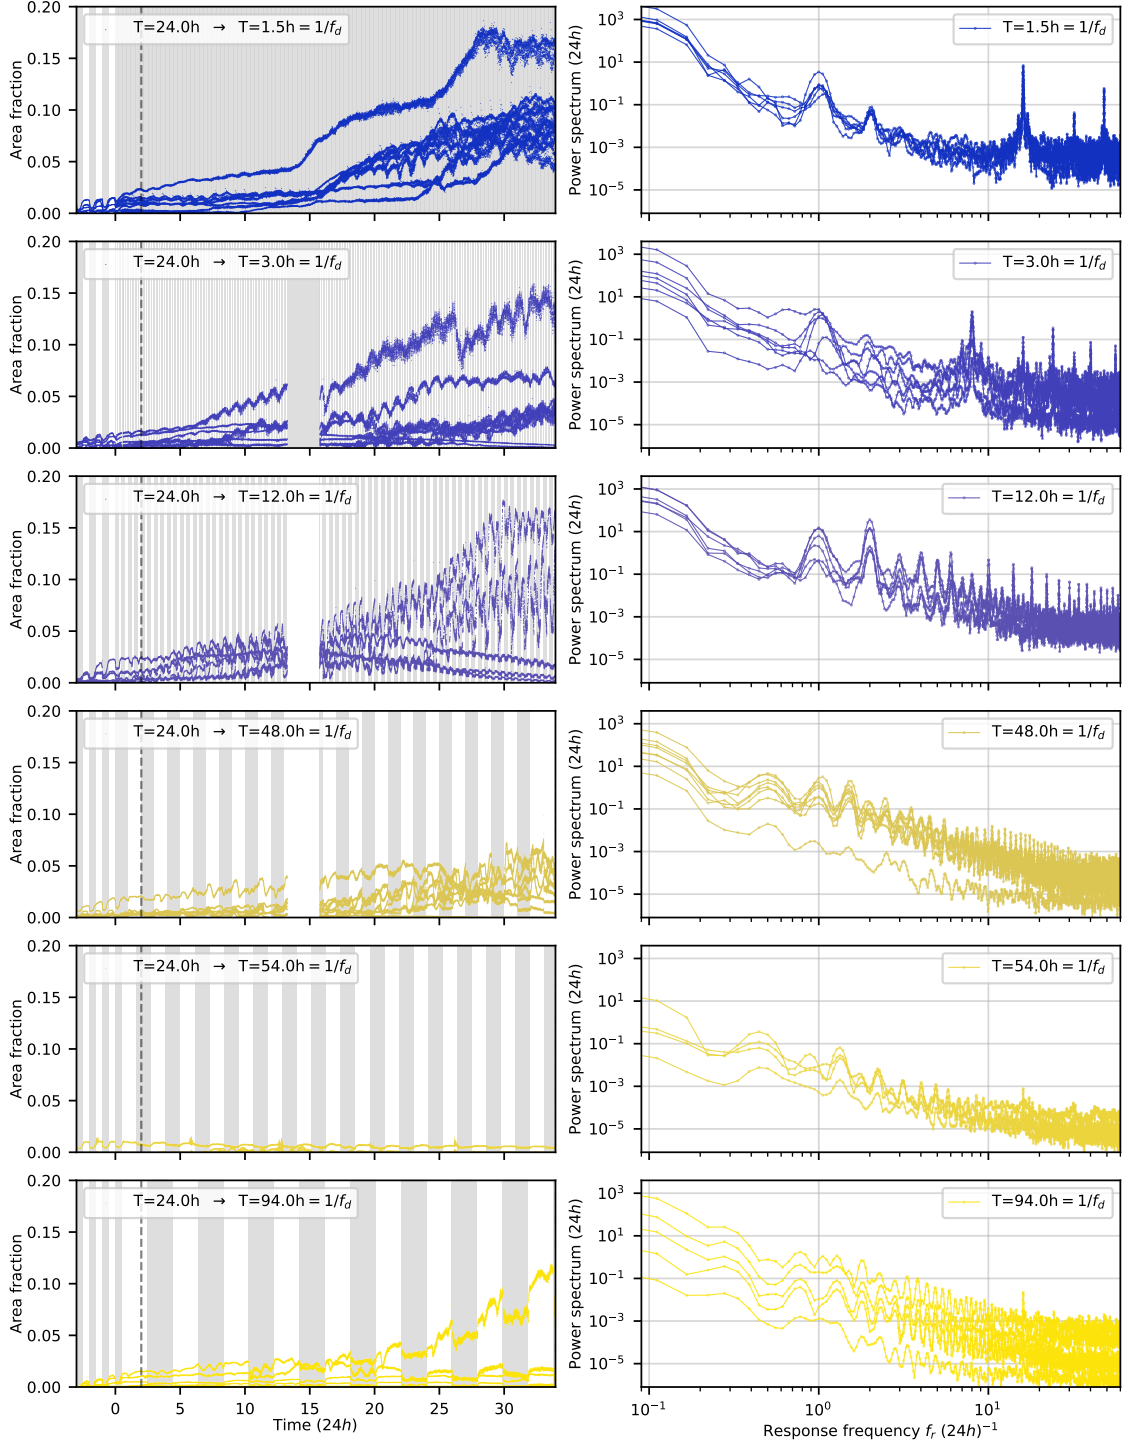

**Supplementary Fig. 2: Time series and corresponding power spectra under driving periods far from 24h.** Averages over the power spectra curves on the right, grouped by driving illumination frequencies  $f_d = 1/T$ , are presented in Fig. 3c as heatmaps. Examples from the  $T=3h$  and  $T=48h$  panels on the left are highlighted in Fig. 3a,b. Power spectra are inferred from intervals starting two days after the transition from 12hL-12hD to the new driving illumination protocol, marked by the dashed vertical line on the time series.

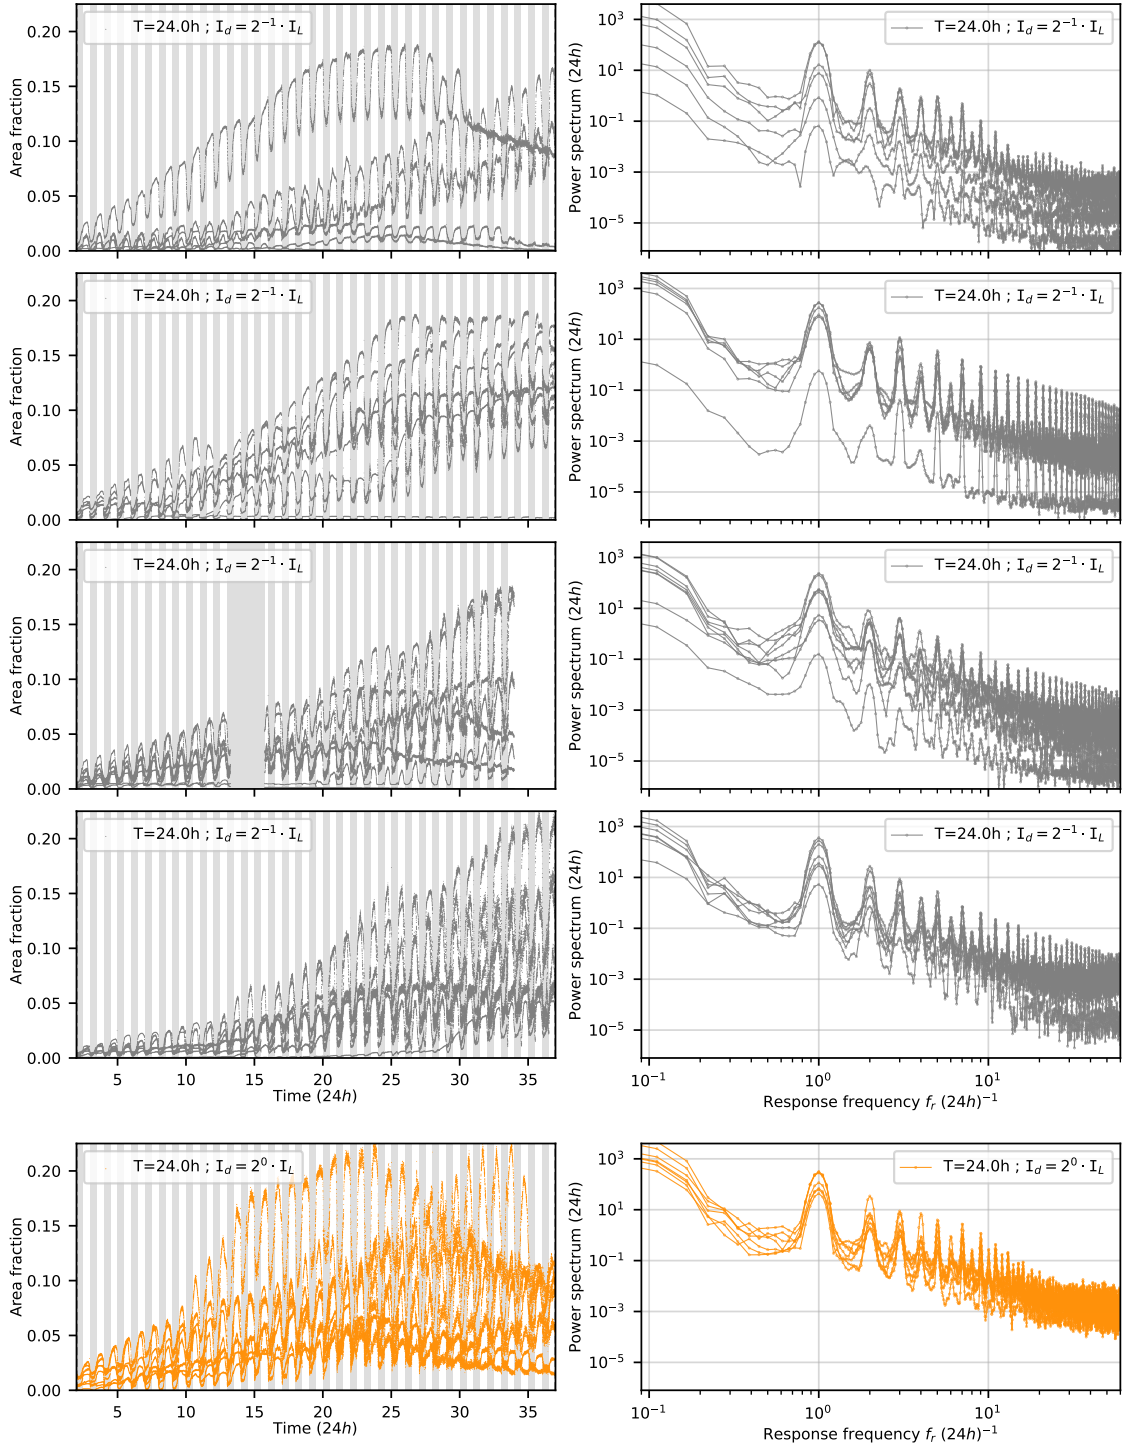

**Supplementary Fig. 3: Additional time series and corresponding power spectra under driving period  $T=24h$ .** Panels are grouped by culture dish. Averaging over the power spectra curves corresponding to  $T=24h$   $I_d = 2^{-1} \cdot I_L$ , in grey (top four panels), together with  $T=24h$  in Supplementary Fig. 1, results in the heatmap column labeled  $f_d = 1/24h$  in Fig. 3c. For comparison, samples subject to  $T=24h$   $I_d = 2^0 \cdot I_L$  are presented in orange (bottom panel).

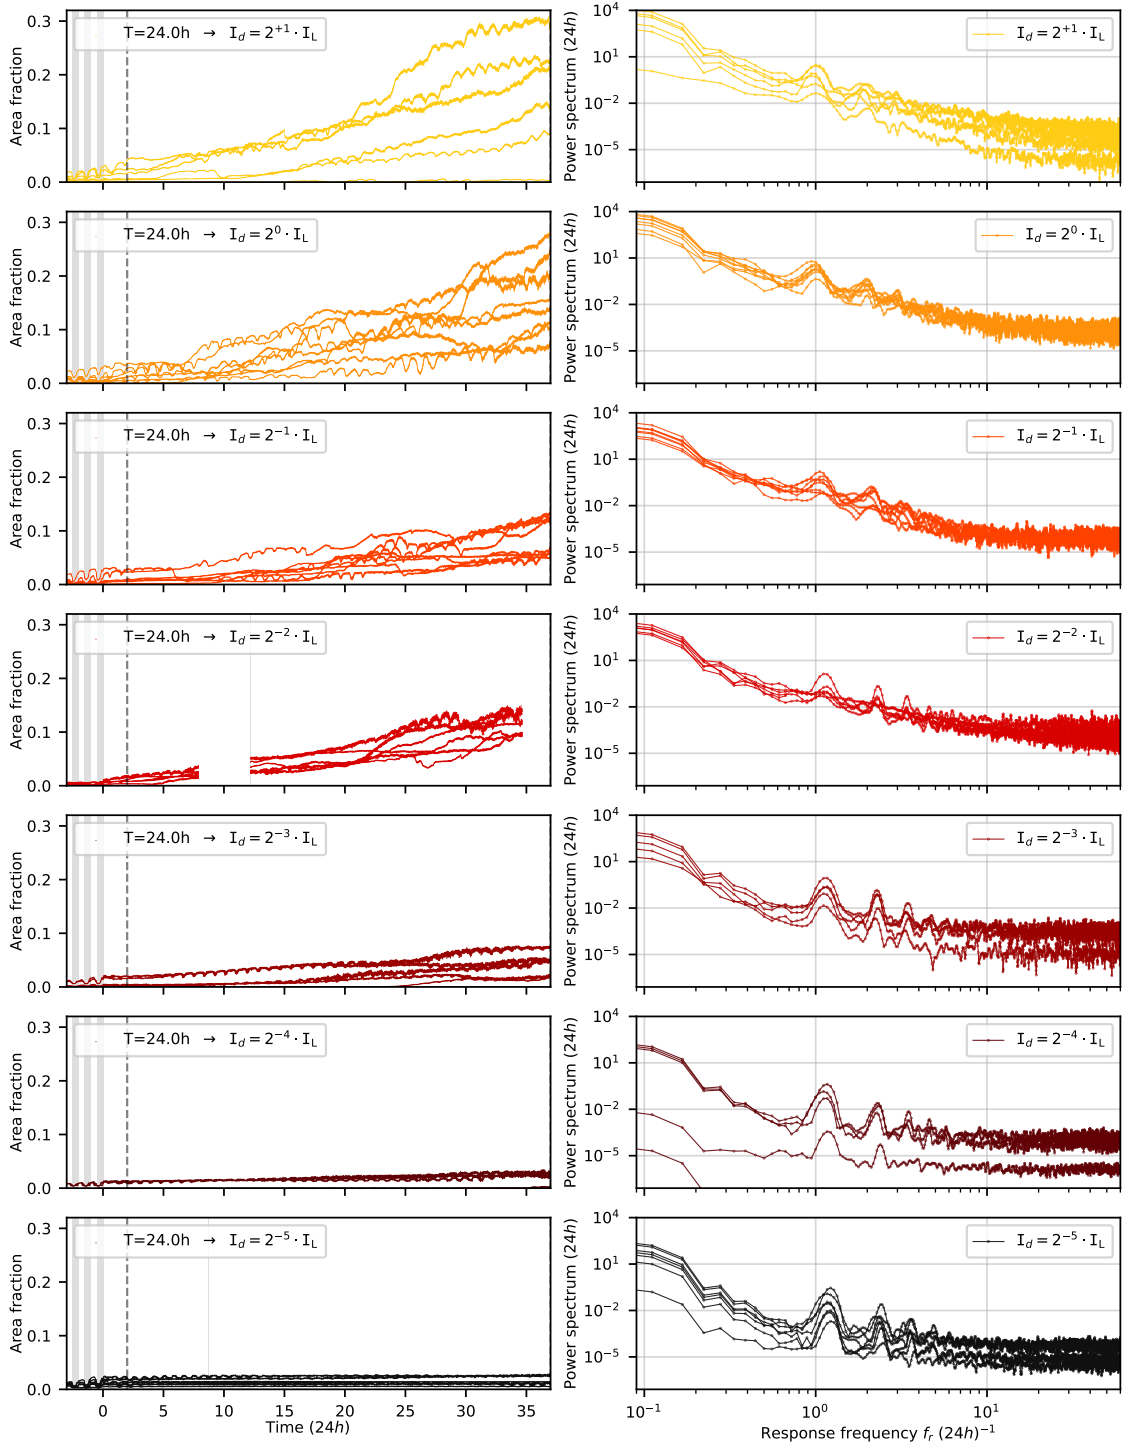

**Supplementary Fig. 4: Time series and corresponding power spectra under constant illumination intensities within  $2^{-5} \cdot I_L$  to  $2^{+1} \cdot I_L$ .** Response fundamental frequencies  $f_{r,0}$  inferred from the power spectra on the right are presented in Fig. 4c. Averages over power spectra curves, grouped by driving illumination  $I_d$ , are shown in Fig. 4d. Examples from the  $I_d = 2^{-5} \cdot I_L$  and  $I_d = 2 \cdot I_L$  panels on the left are highlighted in Fig. 4a,b. Power spectra are inferred from intervals starting two days after the transition from 12hL-12hD to the new driving illumination protocol, marked by the dashed vertical line on the time series.

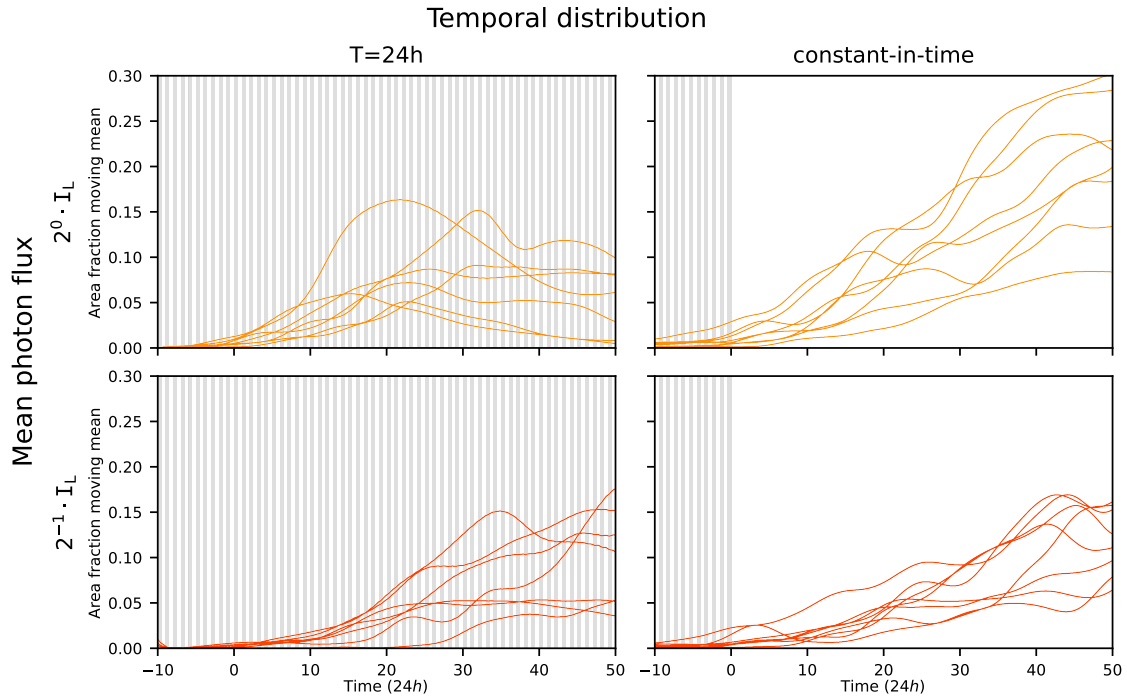

**Supplementary Fig. 5: Apparent area growth curves comparing mean photon flux levels  $2^0 \cdot I_L$  and  $2^{-1} \cdot I_L$ , at T=24h and constant illumination.** Growth curves inferred from time-series by moving averages. The constant-in-time column shows data presented in Fig. 4e, plotted again here for comparison with T=24h illumination. Snapshots on day 25 of three samples from each of the above panels are presented in Fig. 5.
