# Supplementary material for: Macroscopic waves, biological clocks and morphogenesis driven by light in a giant unicellular green alga
Source: Springer Nature journal article supplement (doi:10.1038/s41467-023-41813-6), 2023-10-04
Supplement: MOESM3 [file 41467_2023_41813_MOESM3_ESM.pdf]

## **Description of Additional Supplementary Files**

**Supplementary Movie 1.** Time-lapse imaging of algal samples regenerating under 12hL-12hD, T=24h cycles. One month of regeneration under 12h Light - 12h Dark; 3 seconds correspond to 24h; 3 wells, 3cm x 4cm each. The waves of greenness show synchronisation within individual cells, and among them.
